# Supplementary material for: Effects of a Web-Based Weight Loss Program on the Healthy Eating Index-NVS in Adults with Overweight or Obesity and the Association with Dietary, Anthropometric and Cardiometabolic Variables: A Randomized Controlled Clinical Trial
Source: MDPI journal article supplement (doi:10.3390/nu15010007), 2022-12-20
Supplement: s1 [file s1]

## Supplementary Materials

**Table S1.** Components and scoring standards of the HEI-NVS (adapted from [22]).

| Component       | Maximum points | Standard for 10 points/recommendation                                         | Calculation                                                                                                            |
|-----------------|----------------|-------------------------------------------------------------------------------|------------------------------------------------------------------------------------------------------------------------|
| Fruits          | 15             | 250 g/day                                                                     | Intake*10/recommendation                                                                                               |
| Vegetables      | 15             | 400 g/day                                                                     |                                                                                                                        |
| Grains          | 10             | 350-560 g/day                                                                 |                                                                                                                        |
| Dairy           | 10             | 2 portions<br>1 portion = 200-250 g of milk/yoghurt or 50-60 g of cheese/curd | If intake ≤ recommendation, then intake*10/recommendation<br>If intake > recommendation, then recommendation*10/intake |
| Fish            | 10             | 150-220 g/week                                                                | If intake ≤ recommendation, then 10 points<br>If intake > recommendation, then recommendation*10/actual                |
| Meat            | 10             | < 300-600 g/week                                                              |                                                                                                                        |
| Eggs            | 10             | ≤ 180 g/week                                                                  |                                                                                                                        |
| Alcohol         | 10             | women: ≤ 10 g ethanol/day<br>men: ≤ 20 g ethanol/day                          | If intake ≥ recommendation, then 10 points<br>If intake < recommendation, then intake*10/recommendation                |
| Spreadable Fats | 10             | ≤ 15–30 g/day                                                                 |                                                                                                                        |
| Beverages       | 10             | ≥ 1,5 l/day                                                                   |                                                                                                                        |

**Table S2.** Descriptive statistics of variables used for correlation independent of study group (ITT analysis). <sup>1</sup>

| Variables                       | t0              | t1               | t3               |
|---------------------------------|-----------------|------------------|------------------|
| HEI-NVS [score]                 | 75.61 (10.56)   | 76.54 (9.98)     | 76.19 (10.13)    |
| Energy density [kcal/g]         | 1.64 (0.35)     | 1.48 (0.32)      | 1.55 (0.33)      |
| Energy intake [kcal/day]        | 1978.1 (574.46) | 1820.19 (499.69) | 1865.35 (544.52) |
| Body weight [kg]                | 88.39 (10.65)   | 85.68 (10.81)    | 85.63 (11.41)    |
| Waist circumference [cm]        | 100.42 (9.22)   | 98.04 (9.15)     | 97.15 (8.95)     |
| Fat mass [kg]                   | 35.09 (6.16)    | 33.05 (6.12)     | 33.40 (6.71)     |
| Fat free mass [kg]              | 53.24 (9.19)    | 52.43 (9.04)     | 52.04 (8.54)     |
| Total cholesterol [mg/dl]       | 215.22 (41.92)  | 209.30 (39.38)   | 209.04 (38.14)   |
| HDL-cholesterol [mg/dl]         | 57.60 (11.50)   | 57.14 (10.10)    | 59.56 (10.63)    |
| LDL-cholesterol [mg/dl]         | 135.00 (35.20)  | 131.42 (31.66)   | 142.18 (30.24)   |
| Fasting blood glucose [mg/dl]   | 89.24 (10.04)   | 89.17 (8.95)     | 87.85 (11.00)    |
| Hba1c [%]                       | 5.41 (0.43)     | 5.40 (0.34)      | 5.46 (0.29)      |
| Systolic blood pressure [mmHg]  | 129.58 (13.73)  | 126.63 (13.56)   | 127.37 (12.19)   |
| Diastolic blood pressure [mmHg] | 87.56 (8.77)    | 85.50 (8.70)     | 86.51 (7.77)     |

<sup>1</sup> Data are presented as mean (SD).

## References

- Wittig, F.; Heuer, T.; Claupein, E.; Pfau, C.; Cordts, A.; Schulze, B.; Padilla Bravo, C.A.; Spiller, A. (Eds.) *Auswertung der Daten der Nationalen Verzehrsstudie II (NVS II): Eine Integrierte Verhaltens- und Lebensbasierte Analyse des Bio-Konsums*; Rubner-Institut: Karlsruhe, Germany; Georg-August-University Göttingen: Göttingen, Germany, 2010; pp. 51–68.
